# Supplementary material
Source: PubMed Central journal article supplement (PMC4108936)

## Supplementary Data

**SUPPLEMENTARY FIG. S1.** Representative averaged mean ATR-FTIR spectra of serum obtained from: uninfected controls (*blue*), HIV<sup>pos</sup> ART<sup>pos</sup> (*red*), and HIV<sup>pos</sup> ART<sup>neg</sup> (*pink*).

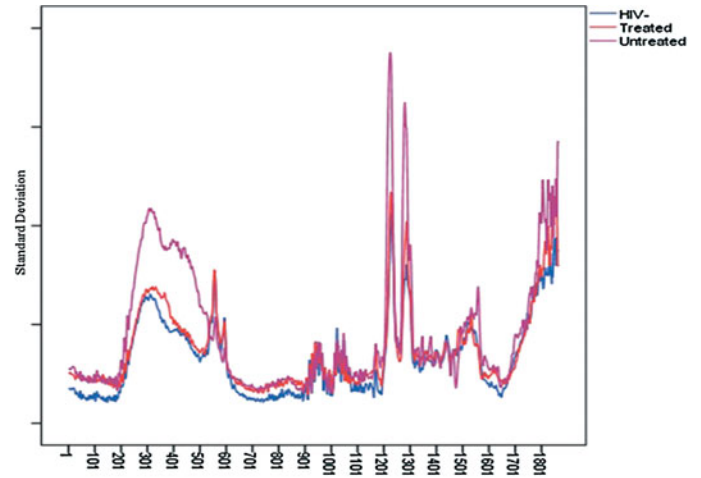

Supplement: Supp_Fig1.pdf [file Supp_Fig1.pdf]
