# Supplementary material
Source: PubMed Central journal article supplement (PMC4108936)
Supplement: Supp_Fig2.pdf [file Supp_Fig2.pdf]

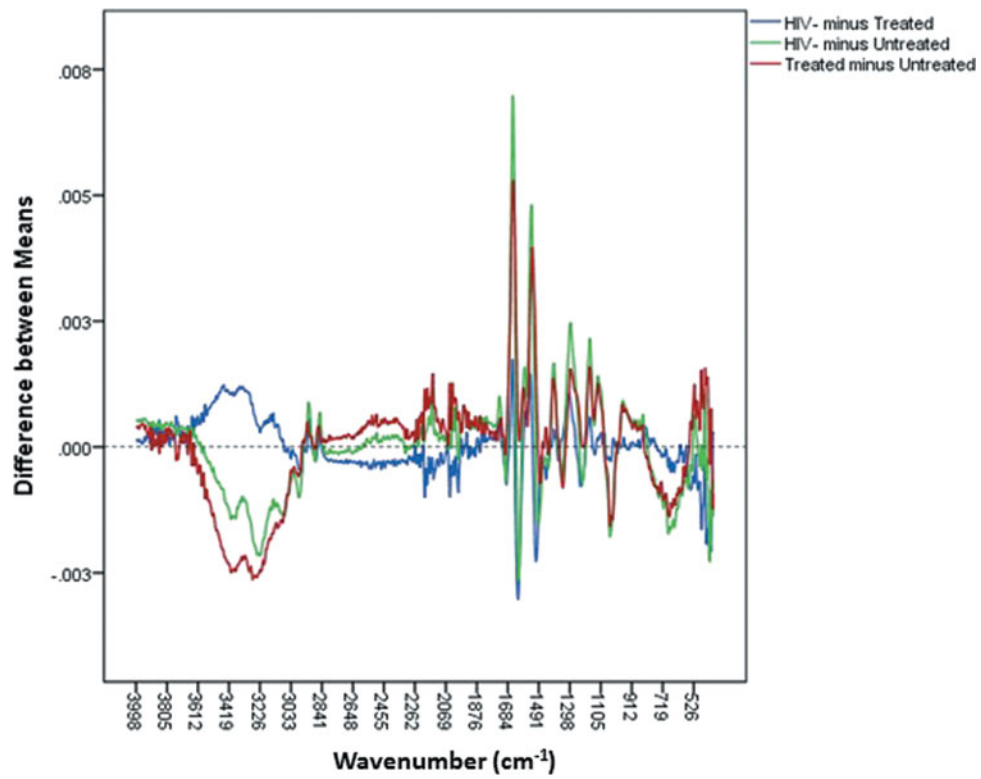

**SUPPLEMENTARY FIG. S2.** Representative averaged mean ATR-FTIR spectra of serum obtained from: uninfected controls: HIV<sup>pos</sup> ART<sup>pos</sup> (*blue*), uninfected: HIV<sup>pos</sup> ART<sup>neg</sup> (*green*), and HIV<sup>pos</sup> ART<sup>pos</sup> - HIV<sup>pos</sup> ART<sup>neg</sup> (*red*).
