# Supplementary material
Source: PubMed Central journal article supplement (PMC4108936)
Supplement: Supp_Fig3.pdf [file Supp_Fig3.pdf]

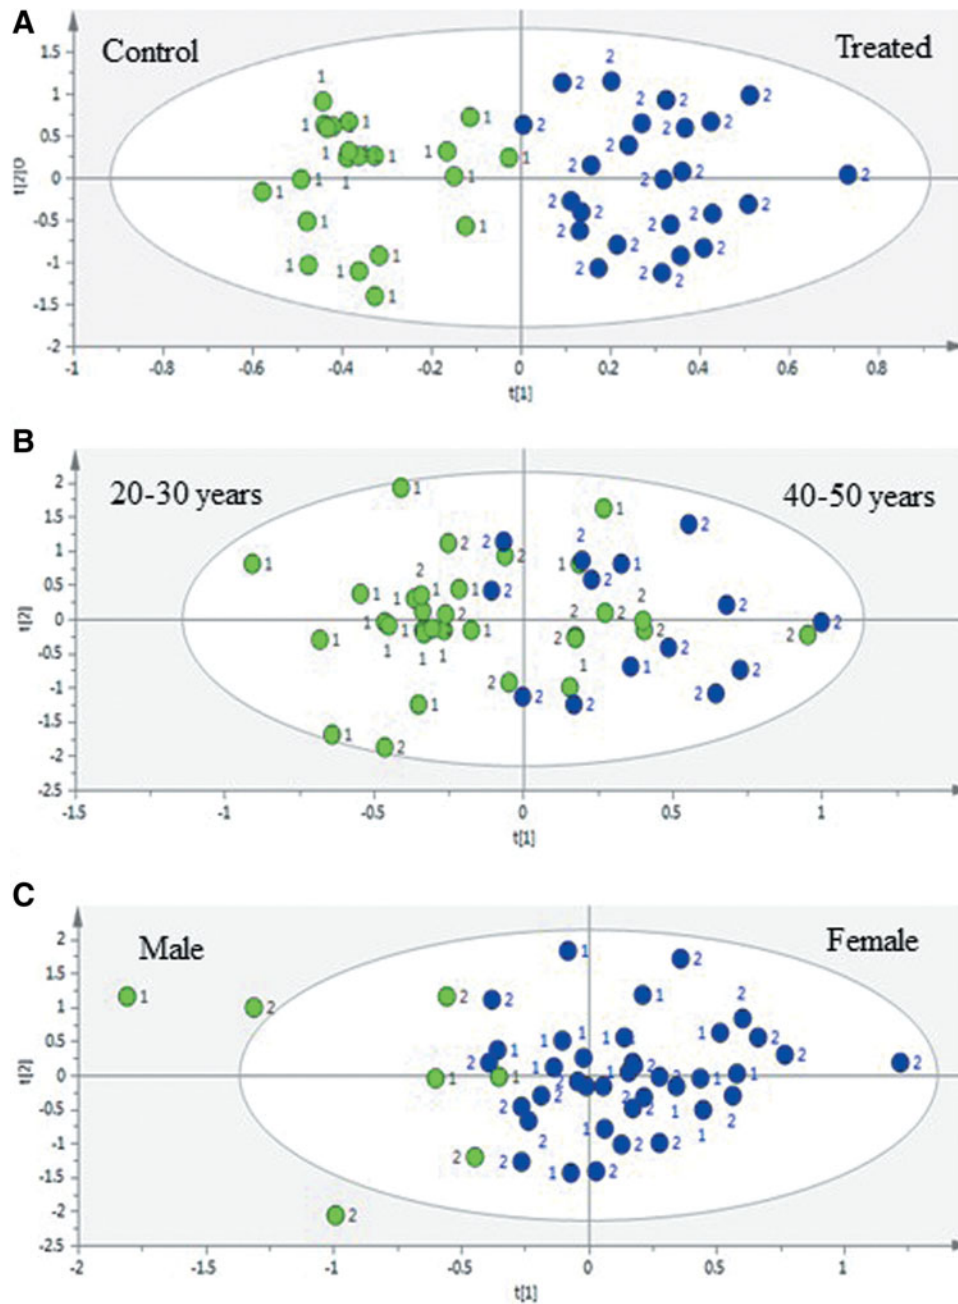

**SUPPLEMENTARY FIG. S3.** OPLS-DA scores plots depicting the effects of age and gender in comparison to the original model of HIV<sup>pos</sup> ART<sup>pos</sup> patients and uninfected controls. Scores plots generated from: (A) OPLS-DA of HIV<sup>pos</sup> ART<sup>pos</sup> patients and uninfected controls. (B) OPLS-DA of differences in age with 20–30 years (*green*) and 40–50 years (*blue*). (C) OPLS-DA of differences in gender with male (*green*) and female (*blue*). Numeric 1 and 2 represent the uninfected control and treated groups, respectively. (B) and (C) show that the chemistry that plays a role in the differences of both age and gender is different to the chemistry that plays a role in the differences between HIV-infected individuals and uninfected controls (A). This therefore means that age and gender had no influence on the HIV<sup>pos</sup> ART<sup>pos</sup> patients and uninfected controls model.
