# Supplementary material
Source: PubMed Central journal article supplement (PMC4108936)
Supplement: Supp_Fig4.pdf [file Supp_Fig4.pdf]

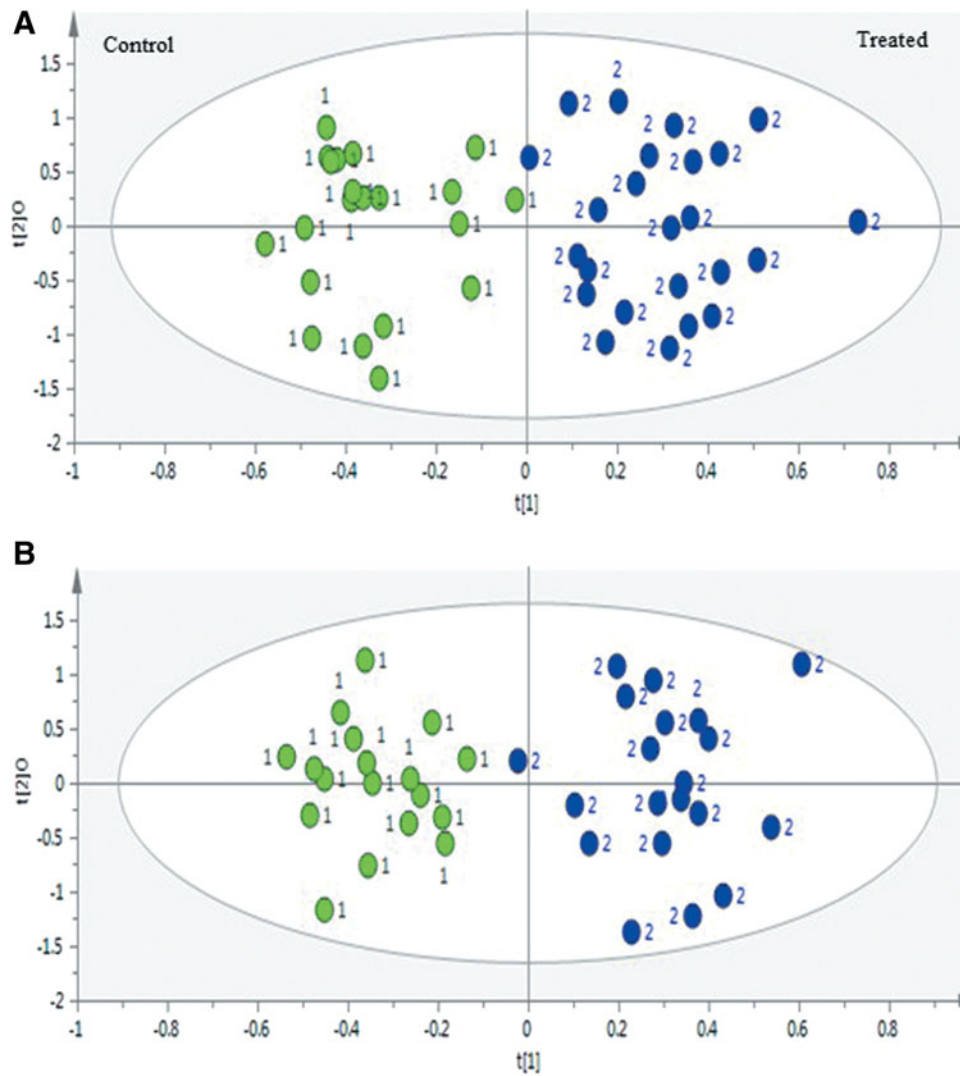

**SUPPLEMENTARY FIG. S4.** Comparison of OPLS-DA scores plots representing (A) the original model with 38 female and 7 male samples, and (B) new model with the removal of the 7 male samples (100% female). Numeric 1 and 2 represent the uninfected control and treated groups, respectively. This figure shows that the exclusion of the 7 male samples had minimal effect on the original model, meaning that gender had no influence on the original OPLS-DA model.
